# Supplementary material
Source: PubMed Central journal article supplement (PMC4629534)
Supplement: ja5b07327_si_001.pdf [file ja5b07327_si_001.pdf]

## Supporting Information

### **Dependence of Vibronic Coupling on Molecular Geometry and Environment:**

### **Bridging Hydrogen Atom Transfer and Electron-Proton Transfer**

Aparna Karippara Harshan,<sup>†</sup> Tao Yu,<sup>†</sup> Alexander V. Soudackov, and Sharon Hammes-Schiffer\*

*Department of Chemistry, 600 South Mathews Avenue, University of Illinois at Urbana-Champaign,  
Urbana, Illinois 61801*

\*corresponding author; e-mail: shs3@illinois.edu

<sup>†</sup>These authors contributed equally to this paper.

## Phenoxy/Phenol System

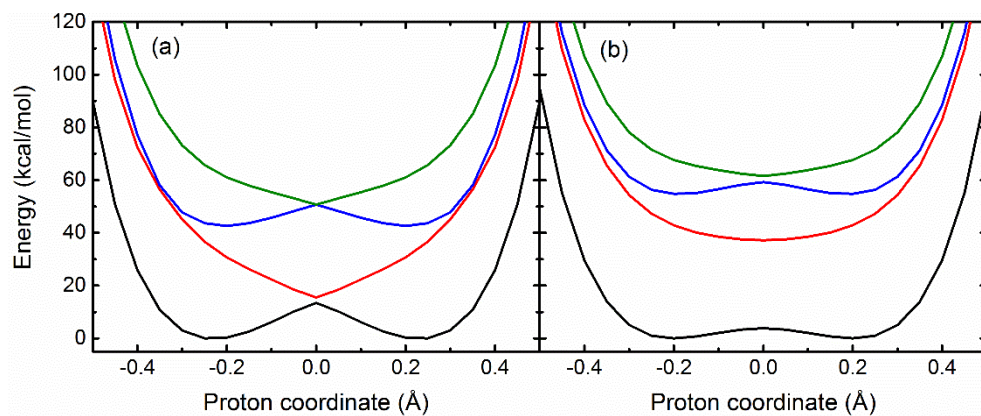

**Figure S1.** Four-state averaged CASSCF proton potential energy curves for the (a) open and (b) stacked geometries of the phenoxy-phenol system. The results shown in this figure were generated with the 6-31G basis set using Molpro.

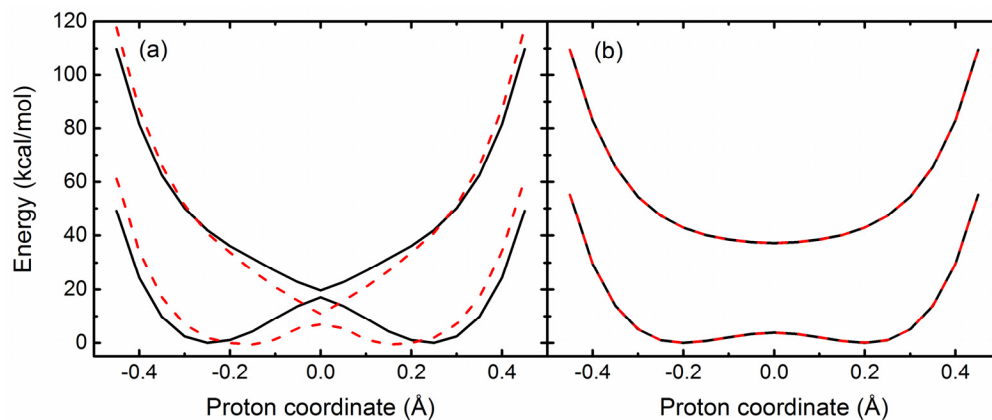

**Figure S2.** CASSCF (solid black lines) and CASPT2 (dashed red lines) proton potential energy curves for the (a) open and (b) stacked geometries of the phenoxy-phenol system. The results shown in this figure were generated with the 6-31G basis set using Molcas.

### Transition state geometries for phenoxy-phenol from M06-2X/6311+G\*\* calculations

Coordinates given in Angstroms.

Open TS: E = -614.2129158 Hartrees

|   |             |             |            |
|---|-------------|-------------|------------|
| C | -0.39280033 | -2.06860660 | 0.00000000 |
| O | -0.82873155 | -0.84774822 | 0.00000000 |
| H | 0.00000000  | 0.00000000  | 0.00000000 |
| C | 0.99420344  | -2.37493095 | 0.00000000 |
| C | 1.40978980  | -3.68741611 | 0.00000000 |
| C | 0.47933002  | -4.72950621 | 0.00000000 |
| C | -0.88734752 | -4.44184144 | 0.00000000 |
| C | -1.32551216 | -3.13697647 | 0.00000000 |
| H | 1.70350816  | -1.55865867 | 0.00000000 |
| H | 2.46707498  | -3.91338506 | 0.00000000 |
| H | 0.81637527  | -5.75608459 | 0.00000000 |
| H | -1.60578419 | -5.24969308 | 0.00000000 |
| H | -2.37707620 | -2.88788567 | 0.00000000 |
| O | 0.82873155  | 0.84774822  | 0.00000000 |
| C | 0.39280033  | 2.06860660  | 0.00000000 |
| C | 1.32551216  | 3.13697647  | 0.00000000 |
| C | 0.88734752  | 4.44184144  | 0.00000000 |
| C | -0.47933002 | 4.72950621  | 0.00000000 |
| C | -1.40978980 | 3.68741611  | 0.00000000 |
| C | -0.99420344 | 2.37493095  | 0.00000000 |
| H | 2.37707620  | 2.88788567  | 0.00000000 |
| H | 1.60578419  | 5.24969308  | 0.00000000 |

|   |             |            |            |
|---|-------------|------------|------------|
| H | -0.81637527 | 5.75608459 | 0.00000000 |
| H | -2.46707498 | 3.91338506 | 0.00000000 |
| H | -1.70350816 | 1.55865867 | 0.00000000 |

Stacked TS: E = -614.2194541 Hartrees

|   |             |             |             |
|---|-------------|-------------|-------------|
| C | 1.46355300  | 0.97546600  | -0.18858600 |
| O | 1.18607200  | 2.23246600  | -0.02615000 |
| H | 0.00002600  | 2.36859100  | -0.00009100 |
| C | 0.95674400  | 0.24412100  | -1.29826100 |
| C | 1.19267900  | -1.11073800 | -1.40758000 |
| C | 1.95332700  | -1.77115700 | -0.44525500 |
| C | 2.49992400  | -1.05924800 | 0.63007700  |
| C | 2.25736200  | 0.28625900  | 0.76859600  |
| H | 0.38076400  | 0.78189400  | -2.03850700 |
| H | 0.78294900  | -1.66219100 | -2.24251300 |
| H | 2.13549100  | -2.83267000 | -0.53621300 |
| H | 3.10290200  | -1.57721000 | 1.36309000  |
| H | 2.64663100  | 0.85665100  | 1.60046500  |
| O | -1.18602200 | 2.23251500  | 0.02617000  |
| C | -1.46351500 | 0.97550800  | 0.18857400  |
| C | -0.95679400 | 0.24417400  | 1.29829100  |
| C | -1.19281400 | -1.11066600 | 1.40765000  |
| C | -1.95343600 | -1.77108300 | 0.44529900  |
| C | -2.49987000 | -1.05920100 | -0.63013000 |
| C | -2.25723600 | 0.28629300  | -0.76867300 |
| H | -0.38066600 | 0.78190700  | 2.03845200  |

|   |             |             |             |
|---|-------------|-------------|-------------|
| H | -0.78320800 | -1.66210300 | 2.24265400  |
| H | -2.13569000 | -2.83257600 | 0.53630600  |
| H | -3.10277100 | -1.57717000 | -1.36320100 |
| H | -2.64637900 | 0.85666700  | -1.60061400 |

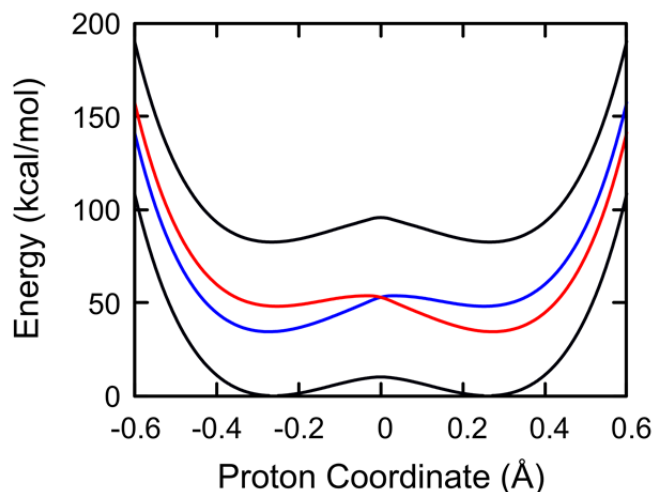

**Figure S3.** Diabatic (blue and red) and adiabatic (black) proton potential energy curves obtained from two-state averaged CASSCF calculations with the 6-31G\*\* basis set and (3,6) active space for the stacked benzyl-toluene structure given in Ref. 13 of the main paper. The semiclassical parameters for this structure are calculated as:  $V^{\text{el}} = 14,965 \text{ cm}^{-1}$ ,  $\tau_p = 3.55 \text{ fs}$ ,  $\tau_e = 0.35 \text{ fs}$ , and  $p = \tau_p / \tau_e = 10.0$ . The vibronic couplings are calculated as:  $V^{(\text{ad})} = 50.9 \text{ cm}^{-1}$ ,  $V^{(\text{sc})} = 50.5 \text{ cm}^{-1}$ ,  $V^{(\text{na})} = 157 \text{ cm}^{-1}$ , and  $V^{(\text{full})} = 50.8 \text{ cm}^{-1}$ . These results indicate that the stacked benzyl-toluene system is electronically adiabatic. Note that a four-state averaged CASSCF calculation may provide more quantitatively accurate results for this system.

### Soybean lipoxygenase system

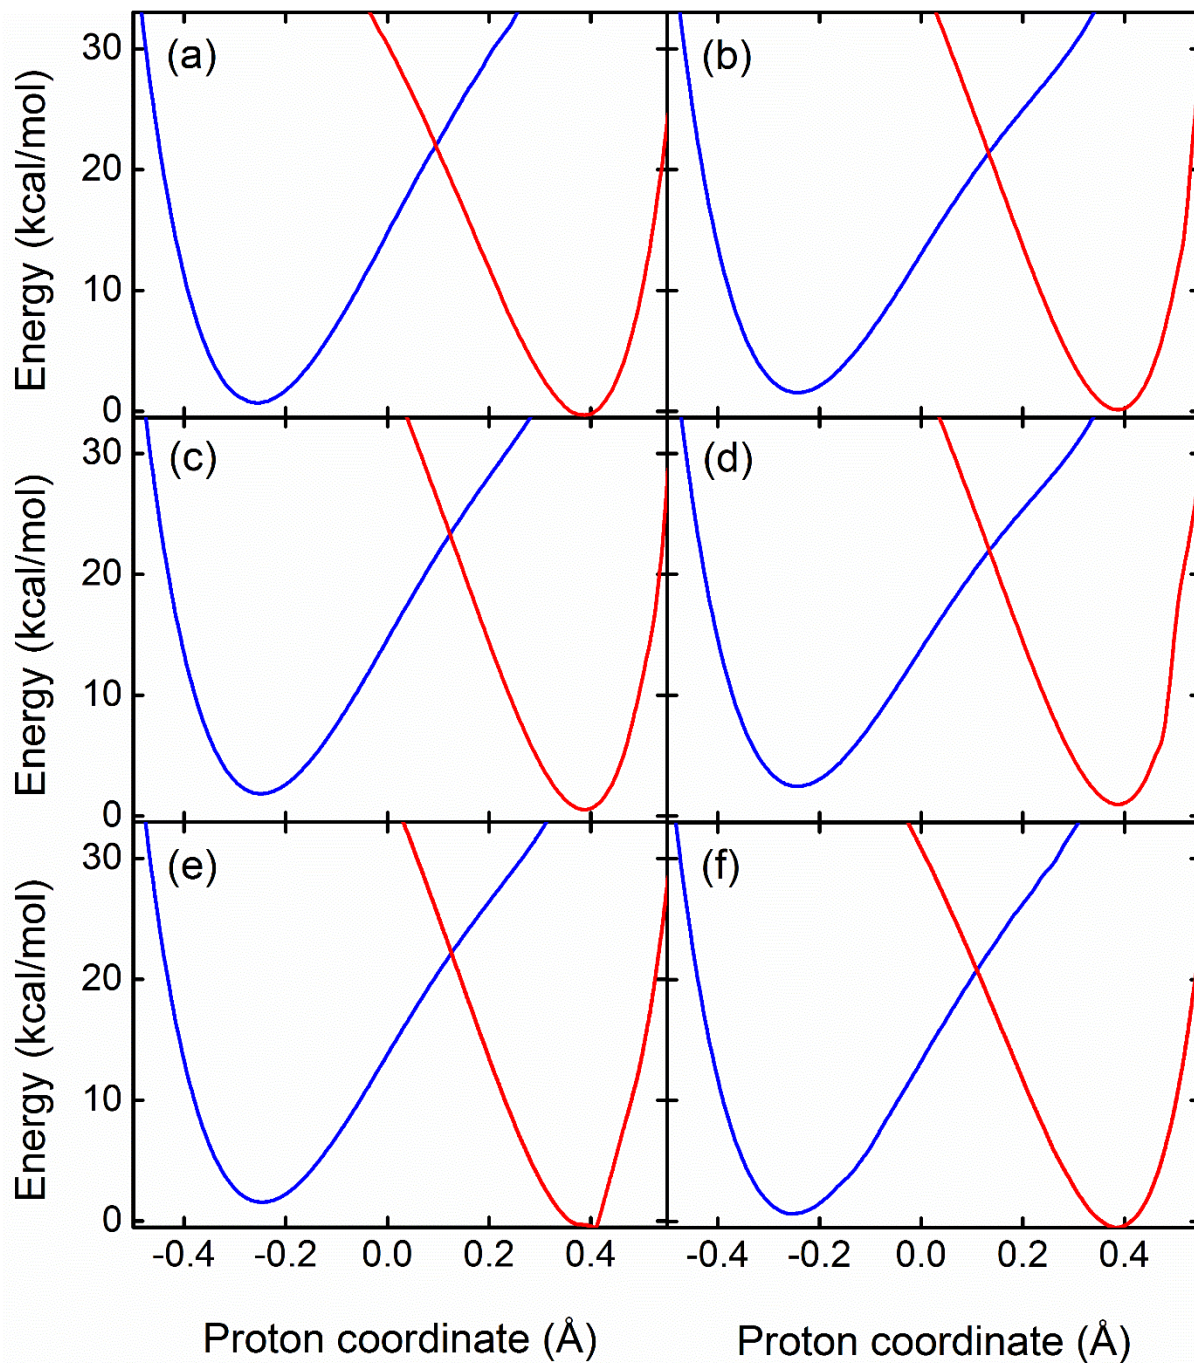

**Figure S4.** Diabatic proton potential energy curves for the SLO system calculated with QM/MM CDFT-CI/ $\omega$ B97X/6-31G\*\* for a configuration obtained by QM/MM geometry optimization with the donor-proton and acceptor-proton distances constrained to be 1.32 Å and 1.38 Å, respectively, for (a), (b), and (c) and both constrained to be 1.35 Å for (d), (e), and (f). The diabatic states were shifted to ensure that the ground proton vibrational energy levels are degenerate. Part (f) is also shown in the main paper.

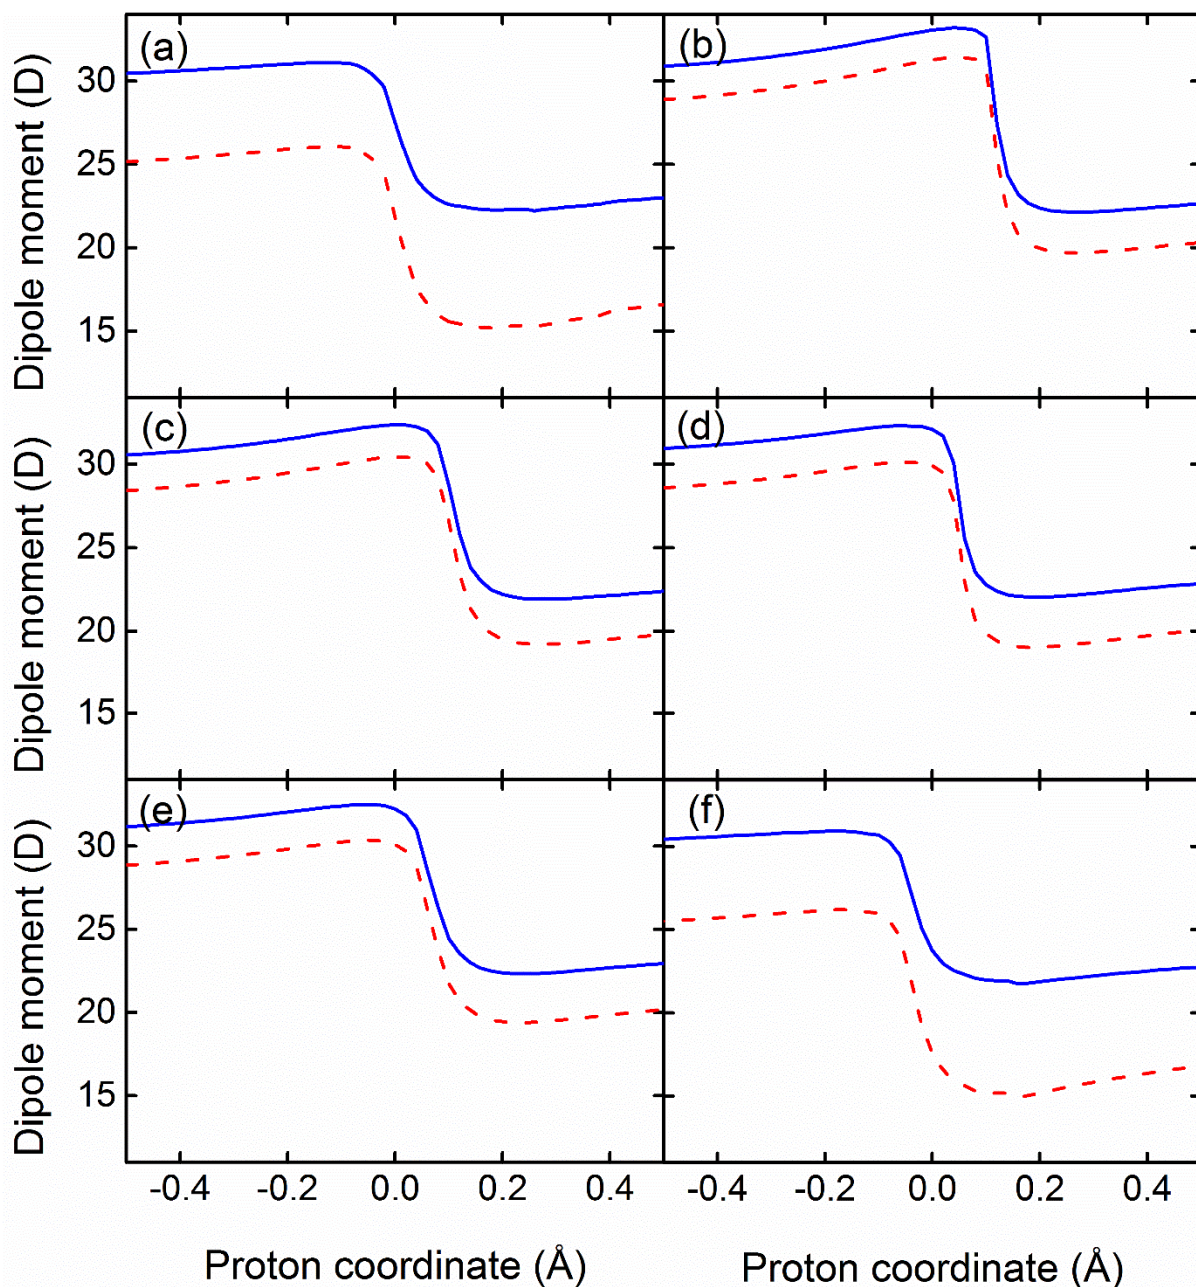

**Figure S5.** Dipole moment as the proton transfers from the donor to the acceptor for an SLO configuration obtained by QM/MM geometry optimization with the donor-proton and acceptor-proton distances constrained to be 1.32 Å and 1.38 Å, respectively, for (a), (b), and (c) and both distances constrained to be 1.35 Å for (d), (e), and (f). The magnitude of the total dipole moment vector (solid blue line) and the dipole moment vector projected onto the axis connecting the donor carbon and the Fe (dashed red line) were calculated for the QM region in the field of MM point charges for the QM/MM DFT/ $\omega$ B97X/6-31G\*\* ground adiabatic electronic state as the proton moves along the proton donor-acceptor axis. Part (f) is also shown in the main paper.



**Table S2. RESP charges for linoleic acid**

| atom | charge  | atom | charge  |
|------|---------|------|---------|
| C18  | -0.2913 | C8   | 0.4234  |
| H181 | 0.1044  | H81  | -0.0807 |
| H182 | 0.1044  | H82  | -0.0807 |
| H183 | 0.1044  | C7   | 0.0648  |
| C17  | -0.2600 | H71  | -0.0212 |
| H171 | 0.1430  | H72  | -0.0212 |
| H172 | 0.1430  | C6   | -0.0710 |
| C16  | -0.4012 | H61  | -0.0094 |
| H161 | 0.1692  | H62  | -0.0094 |
| H162 | 0.1692  | C5   | 0.0586  |
| C15  | -0.2933 | H51  | -0.0127 |
| H151 | 0.1060  | H52  | -0.0127 |
| H152 | 0.1060  | C4   | 0.0702  |
| C14  | 0.3801  | H41  | -0.0175 |
| H141 | -0.0463 | H42  | -0.0175 |
| H142 | -0.0463 | C3   | -0.5005 |
| C13  | -0.3707 | H31  | 0.1341  |
| H13  | 0.1287  | H32  | 0.1341  |
| C12  | -0.0804 | C2   | 0.0437  |
| H12  | 0.1442  | H21  | -0.0101 |
| C11  | -0.4285 | H22  | -0.0101 |
| H111 | 0.2234  | C1   | 0.8041  |
| H112 | 0.2234  | O    | -0.7944 |
| C10  | -0.1384 | O2   | -0.8429 |
| H10  | 0.1599  |      |         |
| C9   | -0.3975 |      |         |
| H9   | 0.1236  |      |         |

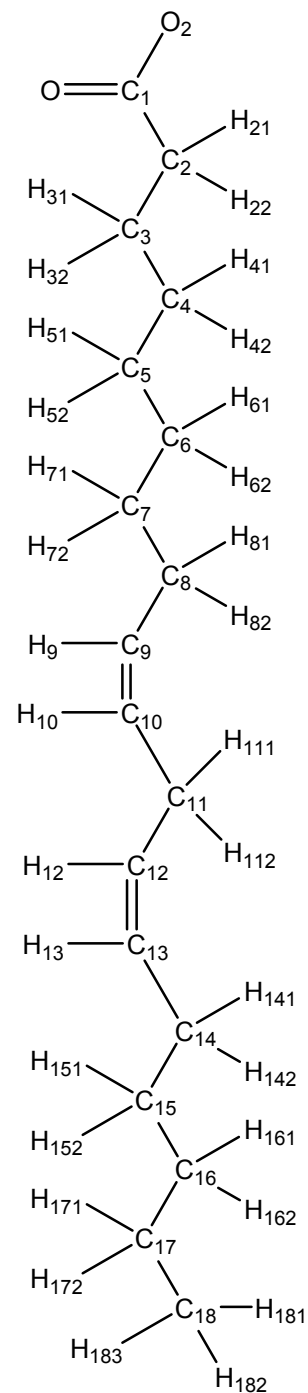

**Table S3. Electronic couplings, semiclassical parameters, and nonadiabatic vibronic couplings for the SLO system**

| Geometry                     | $V^{el}$ (cm <sup>-1</sup> ) | $\tau_p$ (fs) | $\tau_e$ (fs) | $p = \tau_p / \tau_e$ | $V^{(na)}$ (cm <sup>-1</sup> ) |
|------------------------------|------------------------------|---------------|---------------|-----------------------|--------------------------------|
| QM/MM I <sup>a</sup>         | 1532                         | 0.22          | 3.46          | 0.06                  | 2.0                            |
| QM/MM II                     | 1918                         | 0.28          | 2.77          | 0.10                  | 3.6                            |
| QM/MM III                    | 2358                         | 0.31          | 2.30          | 0.13                  | 3.1                            |
| gas phase model <sup>b</sup> | 1607                         | 0.22          | 3.30          | 0.07                  | 1.8                            |

<sup>a</sup> Geometries I, II, and III were obtained from QM/MM geometry optimization of three different snapshots from a classical MD trajectory. The QM/MM optimizations were conducted with the donor-proton and acceptor-proton distances constrained to be 1.32 Å and 1.38 Å, respectively. Results for three other geometries are provided in Table 2 of the main paper.

<sup>b</sup> This result was obtained by previous studies on a gas phase SLO-LA model system.

## Computational details of classical MD simulations of soybean lipoxygenase system

To prepare the system, first the missing residues in the 3PZW structure were added using the Prime module in the Schrödinger package,<sup>1</sup> and the protonation states of the protein at pH = 9.0 were determined using the H++ database.<sup>2,3</sup> Then the linoleic acid (LA) was docked to the active site of SLO using the Glide module in the Schrödinger package.<sup>4</sup> The AMBER99 force field<sup>5</sup> was used to describe the protein. The partial charges of the atoms in the LA were determined by the RESP method,<sup>6</sup> where the LA was first optimized at the B3LYP/6-31G\*\* level of theory, followed by the RESP fitting procedure at the MP2/6-31G\* level of theory using Gaussian09.<sup>7</sup> These partial charges are provided in Table S1 of the Supporting Information. The parameters describing the Fe-ligand bonds and angles were identical to those used in previous studies<sup>8</sup> except the equilibrium Fe-O-C angle for the Ile839 ligand was chosen to be 132° based on the 3PZW crystal structure used herein.<sup>9</sup>

A careful equilibration procedure on the SLO-LA system was performed prior to data collection. First the positions of only the hydrogen atoms were optimized with the rest of the system fixed. Then the complex was immersed in a 134×90×80 Å<sup>3</sup> box of explicit water molecules, and the system was neutralized by adding sodium ions. The water and sodium ions were equilibrated at 303 K in the NVT ensemble for 100 ps. For the subsequent simulation of the full system, a restraining harmonic potential was applied to the proton donor-acceptor distance with an equilibrium distance of 2.7 Å, which was previously found to be the dominant hydrogen tunneling distance,<sup>8</sup> and a large force constant of 2000 kcal/mol Å<sup>2</sup>. The full system was equilibrated by incrementally raising the temperature from 50 K to 100 K, 200 K, and 303 K, performing 40 ps of MD at each temperature in the NVT ensemble. Then 1 ns of MD was performed in the NPT ensemble at 303 K, followed by 20 ns of MD in the NVT ensemble at 303

K. The production MD trajectory was performed in the NVT ensemble for an additional 20 ns. Three snapshots separated by 50 ps near the end of the production trajectory were chosen for the subsequent QM/MM calculations.

## Structures for QM regions of SLO-LA systems

Coordinates given in Angstroms.

First geometry obtained with the donor-proton and acceptor-proton distances constrained to be 1.35 Å during QM/MM optimization.

|   |           |           |          |
|---|-----------|-----------|----------|
| N | 0.017000  | 2.277000  | 3.310000 |
| C | 0.398000  | 1.412000  | 4.309000 |
| N | 2.208000  | 2.149000  | 3.204000 |
| C | 1.762000  | 1.341000  | 4.225000 |
| C | 1.122000  | 2.687000  | 2.666000 |
| H | -0.943000 | 2.489000  | 3.019000 |
| H | 2.445000  | 0.751000  | 4.810000 |
| H | 1.103000  | 3.343000  | 1.812000 |
| H | -0.355000 | 1.006000  | 4.962000 |
| N | 6.536000  | 4.028000  | 5.367000 |
| C | 5.552000  | 3.406000  | 6.106000 |
| N | 5.264000  | 2.918000  | 3.949000 |
| C | 4.786000  | 2.710000  | 5.223000 |
| C | 6.318000  | 3.713000  | 4.065000 |
| H | 7.280000  | 4.607000  | 5.751000 |
| H | 3.938000  | 2.077000  | 5.422000 |
| H | 6.923000  | 4.069000  | 3.246000 |
| H | 5.526000  | 3.419000  | 7.175000 |
| N | 6.025000  | -1.610000 | 2.034000 |
| C | 4.888000  | -2.078000 | 2.660000 |
| N | 4.705000  | 0.140000  | 2.305000 |

|   |           |           |           |
|---|-----------|-----------|-----------|
| C | 4.085000  | -0.981000 | 2.832000  |
| C | 5.870000  | -0.282000 | 1.836000  |
| H | 6.840000  | -2.160000 | 1.781000  |
| H | 3.109000  | -0.931000 | 3.288000  |
| H | 6.593000  | 0.348000  | 1.345000  |
| H | 4.788000  | -3.127000 | 2.889000  |
| C | 2.134000  | -0.232000 | -0.111000 |
| C | 2.899000  | 1.074000  | -0.281000 |
| O | 2.797000  | 1.971000  | 0.595000  |
| N | 3.667000  | 1.277000  | -1.340000 |
| H | 2.739000  | -1.081000 | -0.445000 |
| H | 1.963000  | -0.351000 | 0.959000  |
| H | 4.238000  | 2.139000  | -1.334000 |
| H | 3.852000  | 0.541000  | -2.010000 |
| H | 1.134000  | -0.273000 | -0.591000 |
| C | 9.773000  | 3.305000  | -0.043000 |
| O | 10.316000 | 4.405000  | -0.108000 |
| N | 8.422000  | 3.110000  | 0.001000  |
| C | 7.371000  | 4.131000  | -0.012000 |
| C | 7.515000  | 5.176000  | -1.144000 |
| C | 7.554000  | 4.555000  | -2.549000 |
| C | 6.439000  | 6.273000  | -0.992000 |
| C | 6.671000  | 7.486000  | -1.894000 |
| C | 6.036000  | 3.343000  | -0.002000 |
| O | 5.193000  | 3.540000  | -0.894000 |

|    |           |          |           |
|----|-----------|----------|-----------|
| O  | 5.928000  | 2.508000 | 0.971000  |
| H  | 8.113000  | 2.187000 | 0.277000  |
| H  | 7.393000  | 4.669000 | 0.947000  |
| H  | 8.485000  | 5.654000 | -0.961000 |
| H  | 8.328000  | 3.783000 | -2.622000 |
| H  | 6.593000  | 4.104000 | -2.806000 |
| H  | 7.781000  | 5.322000 | -3.298000 |
| H  | 5.455000  | 5.844000 | -1.201000 |
| H  | 6.417000  | 6.599000 | 0.058000  |
| H  | 6.007000  | 8.316000 | -1.627000 |
| H  | 7.704000  | 7.852000 | -1.831000 |
| H  | 6.473000  | 7.229000 | -2.936000 |
| H  | 10.366000 | 2.352000 | -0.021000 |
| Fe | 4.149000  | 2.401000 | 2.134000  |
| O  | 4.003000  | 4.457000 | 1.817000  |
| H  | 3.614000  | 4.659000 | 0.950000  |
| H  | 3.599000  | 5.431000 | 2.661000  |
| C  | 4.063000  | 9.140000 | 1.868000  |
| C  | 5.182000  | 9.014000 | 2.915000  |
| C  | 5.259000  | 7.872000 | 3.897000  |
| C  | 4.506000  | 6.772000 | 4.158000  |
| C  | 3.235000  | 6.340000 | 3.590000  |
| C  | 2.355000  | 5.483000 | 4.403000  |
| C  | 1.059000  | 5.730000 | 4.680000  |
| C  | 0.311000  | 7.003000 | 4.366000  |

|   |           |          |          |
|---|-----------|----------|----------|
| C | -0.091000 | 7.146000 | 2.884000 |
| H | 3.699000  | 8.158000 | 1.552000 |
| H | 4.475000  | 9.612000 | 0.968000 |
| H | 6.132000  | 8.975000 | 2.367000 |
| H | 5.286000  | 9.943000 | 3.494000 |
| H | 6.156000  | 7.955000 | 4.513000 |
| H | 4.898000  | 6.111000 | 4.931000 |
| H | 2.711000  | 7.098000 | 3.014000 |
| H | 2.798000  | 4.563000 | 4.779000 |
| H | 0.503000  | 4.958000 | 5.209000 |
| H | -0.580000 | 7.038000 | 5.004000 |
| H | 0.928000  | 7.864000 | 4.653000 |
| H | 0.778000  | 7.332000 | 2.244000 |
| H | -0.569000 | 6.238000 | 2.511000 |
| H | 3.208000  | 9.755000 | 2.160000 |
| H | -0.783000 | 7.973000 | 2.746000 |

Second geometry obtained with the donor-proton and acceptor-proton distances constrained to be 1.35 Å during QM/MM optimization.

|   |           |          |          |
|---|-----------|----------|----------|
| N | -0.592000 | 5.023000 | 2.842000 |
| C | -0.550000 | 3.661000 | 3.020000 |
| N | 1.318000  | 4.355000 | 1.992000 |
| C | 0.648000  | 3.264000 | 2.492000 |
| C | 0.531000  | 5.398000 | 2.204000 |
| H | -1.347000 | 5.662000 | 3.126000 |
| H | 1.065000  | 2.274000 | 2.474000 |



|   |           |           |           |
|---|-----------|-----------|-----------|
| H | 0.739000  | 6.407000  | 1.894000  |
| H | -1.284000 | 3.147000  | 3.620000  |
| N | 5.786000  | 5.556000  | 3.945000  |
| C | 4.820000  | 4.909000  | 4.688000  |
| N | 4.326000  | 4.730000  | 2.518000  |
| C | 3.927000  | 4.394000  | 3.796000  |
| C | 5.447000  | 5.426000  | 2.641000  |
| H | 6.603000  | 6.022000  | 4.328000  |
| H | 3.038000  | 3.815000  | 3.979000  |
| H | 6.026000  | 5.803000  | 1.814000  |
| H | 4.862000  | 4.851000  | 5.758000  |
| N | 4.519000  | 0.772000  | -0.880000 |
| C | 3.605000  | 0.213000  | -0.011000 |
| N | 3.541000  | 2.464000  | 0.164000  |
| C | 3.009000  | 1.272000  | 0.622000  |
| C | 4.449000  | 2.117000  | -0.740000 |
| H | 5.227000  | 0.280000  | -1.421000 |
| H | 2.241000  | 1.243000  | 1.374000  |
| H | 5.071000  | 2.809000  | -1.283000 |
| H | 3.460000  | -0.852000 | 0.089000  |
| C | 0.663000  | 2.831000  | -2.011000 |
| C | 1.511000  | 4.074000  | -1.807000 |
| O | 1.525000  | 4.631000  | -0.685000 |
| N | 2.288000  | 4.520000  | -2.789000 |
| H | 1.228000  | 2.080000  | -2.566000 |

|   |           |           |           |
|---|-----------|-----------|-----------|
| H | 0.503000  | 2.432000  | -1.009000 |
| H | 2.814000  | 5.381000  | -2.620000 |
| H | 2.205000  | 4.155000  | -3.731000 |
| H | -0.339000 | 2.909000  | -2.479000 |
| C | 8.339000  | 5.243000  | -2.470000 |
| O | 9.029000  | 6.269000  | -2.537000 |
| N | 6.995000  | 5.249000  | -2.301000 |
| C | 6.244000  | 6.446000  | -1.916000 |
| C | 6.226000  | 7.557000  | -2.997000 |
| C | 5.486000  | 7.164000  | -4.281000 |
| C | 5.735000  | 8.880000  | -2.374000 |
| C | 6.105000  | 10.133000 | -3.169000 |
| C | 4.851000  | 6.045000  | -1.353000 |
| O | 3.853000  | 6.729000  | -1.686000 |
| O | 4.825000  | 5.055000  | -0.542000 |
| H | 6.533000  | 4.350000  | -2.301000 |
| H | 6.784000  | 6.872000  | -1.060000 |
| H | 7.283000  | 7.699000  | -3.249000 |
| H | 4.415000  | 7.033000  | -4.102000 |
| H | 5.609000  | 7.938000  | -5.046000 |
| H | 5.888000  | 6.233000  | -4.695000 |
| H | 4.653000  | 8.837000  | -2.228000 |
| H | 6.177000  | 8.966000  | -1.372000 |
| H | 5.929000  | 11.040000 | -2.577000 |
| H | 7.164000  | 10.121000 | -3.456000 |

|    |           |           |           |
|----|-----------|-----------|-----------|
| H  | 5.504000  | 10.218000 | -4.079000 |
| H  | 8.815000  | 4.230000  | -2.499000 |
| Fe | 3.084000  | 4.690000  | 0.727000  |
| O  | 2.909000  | 6.706000  | 0.874000  |
| H  | 2.965000  | 7.052000  | -0.043000 |
| H  | 2.608000  | 7.742000  | 1.685000  |
| C  | 3.392000  | 11.130000 | 0.004000  |
| C  | 4.582000  | 10.569000 | 0.797000  |
| C  | 4.433000  | 10.189000 | 2.254000  |
| C  | 3.491000  | 9.434000  | 2.864000  |
| C  | 2.252000  | 8.894000  | 2.293000  |
| C  | 1.164000  | 8.612000  | 3.236000  |
| C  | -0.137000 | 8.928000  | 3.057000  |
| C  | -0.725000 | 9.641000  | 1.864000  |
| C  | -2.038000 | 10.380000 | 2.174000  |
| H  | 2.526000  | 10.466000 | 0.020000  |
| H  | 3.697000  | 11.221000 | -1.043000 |
| H  | 4.921000  | 9.669000  | 0.262000  |
| H  | 5.411000  | 11.282000 | 0.720000  |
| H  | 5.270000  | 10.501000 | 2.877000  |
| H  | 3.657000  | 9.198000  | 3.916000  |
| H  | 1.913000  | 9.420000  | 1.403000  |
| H  | 1.449000  | 8.134000  | 4.174000  |
| H  | -0.834000 | 8.673000  | 3.854000  |
| H  | 0.016000  | 10.341000 | 1.457000  |

|   |           |           |          |
|---|-----------|-----------|----------|
| H | -0.911000 | 8.907000  | 1.065000 |
| H | -2.835000 | 9.667000  | 2.379000 |
| H | -1.946000 | 11.028000 | 3.051000 |
| H | 3.073000  | 12.117000 | 0.333000 |
| H | -2.344000 | 11.010000 | 1.340000 |

Third geometry obtained with the donor-proton and acceptor-proton distances constrained to be 1.35 Å during QM/MM optimization.

|   |           |          |          |
|---|-----------|----------|----------|
| N | 0.130000  | 4.339000 | 2.439000 |
| C | 0.143000  | 2.978000 | 2.625000 |
| N | 2.042000  | 3.624000 | 1.622000 |
| C | 1.337000  | 2.551000 | 2.112000 |
| C | 1.279000  | 4.686000 | 1.824000 |
| H | -0.597000 | 5.011000 | 2.711000 |
| H | 1.736000  | 1.551000 | 2.100000 |
| H | 1.508000  | 5.692000 | 1.520000 |
| H | -0.626000 | 2.464000 | 3.176000 |
| N | 6.346000  | 4.935000 | 3.568000 |
| C | 5.428000  | 4.188000 | 4.279000 |
| N | 4.989000  | 4.013000 | 2.098000 |
| C | 4.599000  | 3.616000 | 3.361000 |
| C | 6.038000  | 4.805000 | 2.257000 |
| H | 7.121000  | 5.452000 | 3.977000 |
| H | 3.760000  | 2.962000 | 3.516000 |
| H | 6.594000  | 5.247000 | 1.449000 |
| H | 5.459000  | 4.113000 | 5.347000 |

|   |          |           |           |
|---|----------|-----------|-----------|
| N | 5.340000 | -0.015000 | -1.099000 |
| C | 4.307000 | -0.565000 | -0.369000 |
| N | 4.232000 | 1.684000  | -0.216000 |
| C | 3.639000 | 0.498000  | 0.177000  |
| C | 5.253000 | 1.329000  | -0.987000 |
| H | 6.098000 | -0.509000 | -1.566000 |
| H | 2.775000 | 0.480000  | 0.818000  |
| H | 5.931000 | 2.024000  | -1.455000 |
| H | 4.164000 | -1.631000 | -0.283000 |
| C | 1.155000 | 2.028000  | -2.176000 |
| C | 2.082000 | 3.231000  | -2.123000 |
| O | 2.196000 | 3.842000  | -1.032000 |
| N | 2.825000 | 3.568000  | -3.169000 |
| H | 1.703000 | 1.177000  | -2.580000 |
| H | 0.946000 | 1.805000  | -1.129000 |
| H | 3.399000 | 4.414000  | -3.083000 |
| H | 2.643000 | 3.162000  | -4.080000 |
| H | 0.169000 | 2.056000  | -2.685000 |
| C | 8.984000 | 4.622000  | -3.105000 |
| O | 9.563000 | 5.709000  | -3.196000 |
| N | 7.639000 | 4.491000  | -3.000000 |
| C | 6.822000 | 5.632000  | -2.560000 |
| C | 6.706000 | 6.766000  | -3.607000 |
| C | 6.021000 | 6.346000  | -4.911000 |
| C | 6.081000 | 8.021000  | -2.959000 |

|    |          |           |           |
|----|----------|-----------|-----------|
| C  | 6.445000 | 9.321000  | -3.672000 |
| C  | 5.478000 | 5.140000  | -1.966000 |
| O  | 4.425000 | 5.722000  | -2.329000 |
| O  | 5.533000 | 4.206000  | -1.096000 |
| H  | 7.285000 | 3.555000  | -2.855000 |
| H  | 7.361000 | 6.071000  | -1.710000 |
| H  | 7.747000 | 7.015000  | -3.840000 |
| H  | 6.516000 | 5.469000  | -5.343000 |
| H  | 4.967000 | 6.109000  | -4.746000 |
| H  | 6.077000 | 7.149000  | -5.655000 |
| H  | 4.995000 | 7.909000  | -2.911000 |
| H  | 6.425000 | 8.088000  | -1.917000 |
| H  | 5.930000 | 9.409000  | -4.634000 |
| H  | 6.170000 | 10.196000 | -3.072000 |
| H  | 7.524000 | 9.370000  | -3.862000 |
| H  | 9.592000 | 3.690000  | -3.041000 |
| Fe | 3.800000 | 3.890000  | 0.281000  |
| O  | 3.757000 | 5.909000  | 0.292000  |
| H  | 3.681000 | 6.152000  | -0.657000 |
| H  | 3.377000 | 7.013000  | 0.971000  |
| C  | 3.432000 | 11.200000 | -0.216000 |
| C  | 4.649000 | 10.260000 | -0.120000 |
| C  | 4.953000 | 9.772000  | 1.278000  |
| C  | 4.225000 | 8.848000  | 1.942000  |
| C  | 2.997000 | 8.227000  | 1.423000  |

|   |           |           |           |
|---|-----------|-----------|-----------|
| C | 1.904000  | 8.050000  | 2.395000  |
| C | 0.680000  | 8.608000  | 2.302000  |
| C | 0.160000  | 9.518000  | 1.215000  |
| C | -1.368000 | 9.622000  | 1.249000  |
| H | 2.542000  | 10.740000 | 0.217000  |
| H | 3.211000  | 11.403000 | -1.269000 |
| H | 4.471000  | 9.398000  | -0.775000 |
| H | 5.528000  | 10.766000 | -0.530000 |
| H | 5.812000  | 10.211000 | 1.785000  |
| H | 4.526000  | 8.565000  | 2.951000  |
| H | 2.660000  | 8.673000  | 0.487000  |
| H | 2.143000  | 7.496000  | 3.303000  |
| H | -0.001000 | 8.449000  | 3.137000  |
| H | 0.614000  | 10.512000 | 1.342000  |
| H | 0.493000  | 9.173000  | 0.227000  |
| H | -1.798000 | 8.665000  | 0.957000  |
| H | -1.716000 | 9.855000  | 2.263000  |
| H | 3.578000  | 12.153000 | 0.286000  |
| H | -1.784000 | 10.370000 | 0.576000  |

First geometry obtained with the donor-proton and acceptor-proton distances constrained to be 1.32 and 1.38 Å, respectively, during QM/MM optimization.

|   |          |          |          |
|---|----------|----------|----------|
| N | 0.044000 | 2.258000 | 3.286000 |
| C | 0.411000 | 1.382000 | 4.278000 |
| N | 2.233000 | 2.100000 | 3.178000 |
| C | 1.776000 | 1.294000 | 4.198000 |

|   |           |           |           |
|---|-----------|-----------|-----------|
| C | 1.155000  | 2.659000  | 2.646000  |
| H | -0.912000 | 2.491000  | 2.998000  |
| H | 2.449000  | 0.694000  | 4.782000  |
| H | 1.146000  | 3.327000  | 1.801000  |
| H | -0.345000 | 0.978000  | 4.927000  |
| N | 6.512000  | 4.027000  | 5.337000  |
| C | 5.543000  | 3.386000  | 6.081000  |
| N | 5.263000  | 2.887000  | 3.924000  |
| C | 4.788000  | 2.672000  | 5.201000  |
| C | 6.301000  | 3.705000  | 4.038000  |
| H | 7.246000  | 4.621000  | 5.718000  |
| H | 3.954000  | 2.023000  | 5.402000  |
| H | 6.897000  | 4.075000  | 3.218000  |
| H | 5.521000  | 3.405000  | 7.152000  |
| N | 6.059000  | -1.641000 | 2.030000  |
| C | 4.918000  | -2.098000 | 2.656000  |
| N | 4.758000  | 0.122000  | 2.305000  |
| C | 4.125000  | -0.994000 | 2.825000  |
| C | 5.914000  | -0.313000 | 1.827000  |
| H | 6.869000  | -2.198000 | 1.778000  |
| H | 3.145000  | -0.938000 | 3.272000  |
| H | 6.635000  | 0.310000  | 1.327000  |
| H | 4.803000  | -3.146000 | 2.884000  |
| C | 2.158000  | -0.265000 | -0.141000 |
| C | 2.921000  | 1.040000  | -0.316000 |



|   |           |           |           |
|---|-----------|-----------|-----------|
| O | 2.838000  | 1.928000  | 0.571000  |
| N | 3.664000  | 1.255000  | -1.388000 |
| H | 2.758000  | -1.114000 | -0.485000 |
| H | 1.998000  | -0.385000 | 0.930000  |
| H | 4.241000  | 2.114000  | -1.382000 |
| H | 3.833000  | 0.528000  | -2.072000 |
| H | 1.153000  | -0.303000 | -0.610000 |
| C | 9.790000  | 3.294000  | -0.051000 |
| O | 10.327000 | 4.397000  | -0.129000 |
| N | 8.440000  | 3.084000  | -0.015000 |
| C | 7.378000  | 4.096000  | -0.026000 |
| C | 7.528000  | 5.159000  | -1.136000 |
| C | 7.589000  | 4.555000  | -2.546000 |
| C | 6.446000  | 6.250000  | -0.982000 |
| C | 6.642000  | 7.443000  | -1.919000 |
| C | 6.052000  | 3.295000  | -0.039000 |
| O | 5.217000  | 3.493000  | -0.938000 |
| O | 5.943000  | 2.447000  | 0.925000  |
| H | 8.141000  | 2.161000  | 0.271000  |
| H | 7.373000  | 4.623000  | 0.941000  |
| H | 8.494000  | 5.638000  | -0.936000 |
| H | 8.359000  | 3.777000  | -2.612000 |
| H | 6.630000  | 4.113000  | -2.827000 |
| H | 7.837000  | 5.329000  | -3.279000 |
| H | 5.461000  | 5.809000  | -1.159000 |

|    |           |          |           |
|----|-----------|----------|-----------|
| H  | 6.448000  | 6.600000 | 0.060000  |
| H  | 5.980000  | 8.274000 | -1.653000 |
| H  | 7.674000  | 7.817000 | -1.897000 |
| H  | 6.417000  | 7.157000 | -2.948000 |
| H  | 10.383000 | 2.355000 | -0.006000 |
| Fe | 4.172000  | 2.362000 | 2.103000  |
| O  | 4.045000  | 4.365000 | 1.760000  |
| H  | 3.674000  | 4.551000 | 0.880000  |
| H  | 3.639000  | 5.399000 | 2.580000  |
| C  | 4.015000  | 9.126000 | 1.704000  |
| C  | 5.202000  | 8.955000 | 2.664000  |
| C  | 5.246000  | 7.902000 | 3.744000  |
| C  | 4.493000  | 6.815000 | 4.048000  |
| C  | 3.251000  | 6.314000 | 3.449000  |
| C  | 2.360000  | 5.494000 | 4.305000  |
| C  | 1.099000  | 5.806000 | 4.648000  |
| C  | 0.396000  | 7.117000 | 4.385000  |
| C  | -0.096000 | 7.307000 | 2.935000  |
| H  | 3.604000  | 8.158000 | 1.400000  |
| H  | 4.383000  | 9.601000 | 0.788000  |
| H  | 6.077000  | 8.750000 | 2.030000  |
| H  | 5.463000  | 9.914000 | 3.133000  |
| H  | 6.124000  | 8.033000 | 4.379000  |
| H  | 4.860000  | 6.210000 | 4.878000  |
| H  | 2.718000  | 7.046000 | 2.847000  |

|   |           |          |          |
|---|-----------|----------|----------|
| H | 2.770000  | 4.546000 | 4.649000 |
| H | 0.528000  | 5.056000 | 5.194000 |
| H | -0.449000 | 7.179000 | 5.081000 |
| H | 1.065000  | 7.945000 | 4.648000 |
| H | 0.692000  | 7.719000 | 2.297000 |
| H | -0.404000 | 6.355000 | 2.490000 |
| H | 3.198000  | 9.759000 | 2.056000 |
| H | -0.954000 | 7.973000 | 2.886000 |

Second geometry obtained with the donor-proton and acceptor-proton distances constrained to be 1.32 and 1.38 Å, respectively, during QM/MM optimization.

|   |           |          |          |
|---|-----------|----------|----------|
| N | -0.548000 | 5.030000 | 2.771000 |
| C | -0.507000 | 3.672000 | 2.972000 |
| N | 1.362000  | 4.342000 | 1.929000 |
| C | 0.687000  | 3.260000 | 2.444000 |
| C | 0.578000  | 5.392000 | 2.132000 |
| H | -1.296000 | 5.676000 | 3.055000 |
| H | 1.102000  | 2.269000 | 2.440000 |
| H | 0.793000  | 6.398000 | 1.819000 |
| H | -1.241000 | 3.171000 | 3.579000 |
| N | 5.797000  | 5.532000 | 3.895000 |
| C | 4.836000  | 4.877000 | 4.636000 |
| N | 4.348000  | 4.690000 | 2.466000 |
| C | 3.948000  | 4.355000 | 3.744000 |
| C | 5.462000  | 5.399000 | 2.591000 |
| H | 6.607000  | 6.011000 | 4.278000 |

|   |           |           |           |
|---|-----------|-----------|-----------|
| H | 3.062000  | 3.772000  | 3.927000  |
| H | 6.038000  | 5.785000  | 1.767000  |
| H | 4.877000  | 4.824000  | 5.706000  |
| N | 4.583000  | 0.734000  | -0.872000 |
| C | 3.602000  | 0.188000  | -0.071000 |
| N | 3.550000  | 2.440000  | 0.091000  |
| C | 2.979000  | 1.255000  | 0.519000  |
| C | 4.515000  | 2.080000  | -0.748000 |
| H | 5.317000  | 0.235000  | -1.372000 |
| H | 2.161000  | 1.240000  | 1.217000  |
| H | 5.177000  | 2.764000  | -1.251000 |
| H | 3.451000  | -0.878000 | 0.035000  |
| C | 0.658000  | 2.810000  | -2.035000 |
| C | 1.526000  | 4.043000  | -1.861000 |
| O | 1.574000  | 4.605000  | -0.738000 |
| N | 2.287000  | 4.474000  | -2.860000 |
| H | 1.206000  | 2.047000  | -2.590000 |
| H | 0.517000  | 2.426000  | -1.024000 |
| H | 2.840000  | 5.321000  | -2.703000 |
| H | 2.178000  | 4.105000  | -3.798000 |
| H | -0.358000 | 2.882000  | -2.481000 |
| C | 8.412000  | 5.219000  | -2.461000 |
| O | 9.095000  | 6.250000  | -2.511000 |
| N | 7.064000  | 5.217000  | -2.317000 |
| C | 6.290000  | 6.402000  | -1.941000 |

|    |          |           |           |
|----|----------|-----------|-----------|
| C  | 6.292000 | 7.525000  | -3.009000 |
| C  | 5.603000 | 7.134000  | -4.322000 |
| C  | 5.762000 | 8.833000  | -2.387000 |
| C  | 6.137000 | 10.099000 | -3.158000 |
| C  | 4.887000 | 5.977000  | -1.427000 |
| O  | 3.885000 | 6.630000  | -1.802000 |
| O  | 4.854000 | 4.996000  | -0.602000 |
| H  | 6.611000 | 4.315000  | -2.352000 |
| H  | 6.795000 | 6.821000  | -1.061000 |
| H  | 7.355000 | 7.684000  | -3.223000 |
| H  | 4.529000 | 6.982000  | -4.182000 |
| H  | 5.739000 | 7.920000  | -5.072000 |
| H  | 6.037000 | 6.216000  | -4.733000 |
| H  | 4.677000 | 8.772000  | -2.273000 |
| H  | 6.173000 | 8.914000  | -1.371000 |
| H  | 5.932000 | 10.997000 | -2.562000 |
| H  | 7.203000 | 10.105000 | -3.418000 |
| H  | 5.559000 | 10.185000 | -4.084000 |
| H  | 8.886000 | 4.204000  | -2.475000 |
| Fe | 3.125000 | 4.664000  | 0.662000  |
| O  | 3.005000 | 6.638000  | 0.800000  |
| H  | 3.001000 | 6.982000  | -0.119000 |
| H  | 2.699000 | 7.700000  | 1.627000  |
| C  | 3.383000 | 11.235000 | 0.004000  |
| C  | 4.581000 | 10.642000 | 0.761000  |

|   |           |           |           |
|---|-----------|-----------|-----------|
| C | 4.439000  | 10.258000 | 2.219000  |
| C | 3.533000  | 9.446000  | 2.803000  |
| C | 2.332000  | 8.831000  | 2.200000  |
| C | 1.228000  | 8.567000  | 3.149000  |
| C | -0.057000 | 8.940000  | 2.986000  |
| C | -0.613000 | 9.717000  | 1.813000  |
| C | -1.975000 | 10.367000 | 2.102000  |
| H | 2.504000  | 10.589000 | 0.045000  |
| H | 3.659000  | 11.326000 | -1.051000 |
| H | 4.889000  | 9.742000  | 0.210000  |
| H | 5.422000  | 11.339000 | 0.675000  |
| H | 5.242000  | 10.624000 | 2.858000  |
| H | 3.683000  | 9.223000  | 3.861000  |
| H | 1.984000  | 9.362000  | 1.316000  |
| H | 1.499000  | 8.052000  | 4.072000  |
| H | -0.764000 | 8.693000  | 3.776000  |
| H | 0.116000  | 10.482000 | 1.511000  |
| H | -0.711000 | 9.047000  | 0.946000  |
| H | -2.741000 | 9.605000  | 2.239000  |
| H | -1.953000 | 10.976000 | 3.012000  |
| H | 3.087000  | 12.224000 | 0.347000  |
| H | -2.289000 | 11.015000 | 1.285000  |

Third geometry obtained with the donor-proton and acceptor-proton distances constrained to be 1.32 and 1.38 Å, respectively, during QM/MM optimization.

|   |          |          |          |
|---|----------|----------|----------|
| N | 0.159000 | 4.319000 | 2.445000 |
|---|----------|----------|----------|

|   |           |           |           |
|---|-----------|-----------|-----------|
| C | 0.161000  | 2.957000  | 2.626000  |
| N | 2.061000  | 3.594000  | 1.617000  |
| C | 1.351000  | 2.523000  | 2.106000  |
| C | 1.306000  | 4.661000  | 1.827000  |
| H | -0.564000 | 4.996000  | 2.719000  |
| H | 1.743000  | 1.521000  | 2.091000  |
| H | 1.543000  | 5.668000  | 1.528000  |
| H | -0.610000 | 2.449000  | 3.180000  |
| N | 6.355000  | 4.915000  | 3.552000  |
| C | 5.440000  | 4.170000  | 4.267000  |
| N | 4.998000  | 3.984000  | 2.089000  |
| C | 4.609000  | 3.594000  | 3.354000  |
| C | 6.047000  | 4.779000  | 2.242000  |
| H | 7.129000  | 5.437000  | 3.957000  |
| H | 3.769000  | 2.942000  | 3.514000  |
| H | 6.601000  | 5.219000  | 1.432000  |
| H | 5.471000  | 4.102000  | 5.336000  |
| N | 5.347000  | -0.035000 | -1.096000 |
| C | 4.308000  | -0.580000 | -0.375000 |
| N | 4.235000  | 1.669000  | -0.229000 |
| C | 3.635000  | 0.486000  | 0.160000  |
| C | 5.261000  | 1.310000  | -0.990000 |
| H | 6.108000  | -0.532000 | -1.556000 |
| H | 2.762000  | 0.470000  | 0.789000  |
| H | 5.945000  | 2.000000  | -1.454000 |

|   |          |           |           |
|---|----------|-----------|-----------|
| H | 4.167000 | -1.645000 | -0.283000 |
| C | 1.159000 | 2.016000  | -2.197000 |
| C | 2.096000 | 3.210000  | -2.131000 |
| O | 2.213000 | 3.813000  | -1.034000 |
| N | 2.844000 | 3.552000  | -3.170000 |
| H | 1.701000 | 1.163000  | -2.606000 |
| H | 0.945000 | 1.787000  | -1.152000 |
| H | 3.425000 | 4.392000  | -3.076000 |
| H | 2.658000 | 3.161000  | -4.088000 |
| H | 0.174000 | 2.057000  | -2.705000 |
| C | 8.996000 | 4.590000  | -3.072000 |
| O | 9.565000 | 5.683000  | -3.146000 |
| N | 7.650000 | 4.446000  | -2.974000 |
| C | 6.833000 | 5.590000  | -2.538000 |
| C | 6.741000 | 6.735000  | -3.578000 |
| C | 6.065000 | 6.335000  | -4.891000 |
| C | 6.130000 | 7.998000  | -2.927000 |
| C | 6.533000 | 9.298000  | -3.623000 |
| C | 5.480000 | 5.114000  | -1.960000 |
| O | 4.438000 | 5.713000  | -2.322000 |
| O | 5.518000 | 4.170000  | -1.095000 |
| H | 7.296000 | 3.508000  | -2.849000 |
| H | 7.362000 | 6.021000  | -1.678000 |
| H | 7.788000 | 6.969000  | -3.798000 |
| H | 6.553000 | 5.456000  | -5.326000 |



|    |           |           |           |
|----|-----------|-----------|-----------|
| H  | 5.006000  | 6.110000  | -4.741000 |
| H  | 6.141000  | 7.144000  | -5.626000 |
| H  | 5.041000  | 7.909000  | -2.897000 |
| H  | 6.458000  | 8.049000  | -1.880000 |
| H  | 6.024000  | 9.414000  | -4.585000 |
| H  | 6.282000  | 10.172000 | -3.011000 |
| H  | 7.614000  | 9.320000  | -3.809000 |
| H  | 9.609000  | 3.668000  | -3.017000 |
| Fe | 3.807000  | 3.872000  | 0.277000  |
| O  | 3.759000  | 5.849000  | 0.296000  |
| H  | 3.679000  | 6.110000  | -0.649000 |
| H  | 3.415000  | 6.984000  | 1.001000  |
| C  | 3.413000  | 11.194000 | -0.168000 |
| C  | 4.646000  | 10.275000 | -0.076000 |
| C  | 4.958000  | 9.784000  | 1.320000  |
| C  | 4.254000  | 8.835000  | 1.970000  |
| C  | 3.043000  | 8.172000  | 1.440000  |
| C  | 1.947000  | 8.006000  | 2.423000  |
| C  | 0.729000  | 8.570000  | 2.348000  |
| C  | 0.203000  | 9.494000  | 1.272000  |
| C  | -1.325000 | 9.596000  | 1.316000  |
| H  | 2.532000  | 10.717000 | 0.266000  |
| H  | 3.183000  | 11.395000 | -1.219000 |
| H  | 4.485000  | 9.415000  | -0.737000 |
| H  | 5.518000  | 10.800000 | -0.481000 |

|   |           |           |          |
|---|-----------|-----------|----------|
| H | 5.807000  | 10.238000 | 1.830000 |
| H | 4.561000  | 8.550000  | 2.977000 |
| H | 2.694000  | 8.632000  | 0.515000 |
| H | 2.186000  | 7.434000  | 3.321000 |
| H | 0.050000  | 8.402000  | 3.182000 |
| H | 0.657000  | 10.486000 | 1.405000 |
| H | 0.528000  | 9.157000  | 0.279000 |
| H | -1.751000 | 8.635000  | 1.034000 |
| H | -1.669000 | 9.836000  | 2.329000 |
| H | 3.545000  | 12.148000 | 0.337000 |
| H | -1.747000 | 10.334000 | 0.636000 |

## References

- (1) *Prime*; version 3.9; Schrödinger, LLC, New York, NY, 2015.
- (2) Bashford, D.; Karplus, M. *Biochemistry* **1990**, *29*, 10219.
- (3) Gordon, J. C.; Myers, J. B.; Folta, T.; Shoja, V.; Heath, L. S.; Onufriev, A. *Nucleic Acids Res* **2005**, *33*, W368.
- (4) *Glide*; version 6.2; Schrödinger, LLC, New York, NY, 2014.
- (5) Cornell, W. D.; Cieplak, P.; Bayly, C. I.; Gould, I. R.; Merz, K. M.; Ferguson, D. M.; Spellmeyer, D. C.; Fox, T.; Caldwell, J. W.; Kollman, P. A. *J. Am. Chem. Soc.* **1995**, *117*, 5179.
- (6) Bayly, C. I.; Cieplak, P.; Cornell, W. D.; Kollman, P. A. *J. Phys. Chem.* **1993**, *97*, 10269.
- (7) *Gaussian 09*; Frisch, M. J. T., G. W.; Schlegel, H. B.; Scuseria, G. E.; Robb, M. A.; Cheeseman, J. R.; Scalmani, G.; Barone, V.; Mennucci, B.; Petersson, G. A.; Nakatsuji, H.; Caricato, M.; Li, X.; Hratchian, H. P.; Izmaylov, A. F.; Bloino, J.; Zheng, G.; Sonnenberg, J. L.; Hada, M.; Ehara, M.; Toyota, K.; Fukuda, R.; Hasegawa, J.; Ishida, M.; Nakajima, T.; Honda, Y.; Kitao, O.; Nakai, H.; Vreven, T.; Montgomery, J. A., Jr.; Peralta, J. E.; Ogliaro, F.; Bearpark, M.; Heyd, J. J.; Brothers, E.; Kudin, K. N.; Staroverov, V. N.; Kobayashi, R.; Normand, J.; Raghavachari, K.; Rendell, A.; Burant, J. C.; Iyengar, S. S.; Tomasi, J.; Cossi, M.; Rega, N.; Millam, J. M.; Klene, M.; Knox, J. E.; Cross, J. B.; Bakken, V.; Adamo, C.; Jaramillo, J.; Gomperts, R.; Stratmann, R. E.; Yazyev, O.; Austin, A. J.; Cammi, R.; Pomelli, C.; Ochterski, J. W.; Martin, R. L.; Morokuma, K.; Zakrzewski, V. G.; Voth, G. A.; Salvador, P.; Dannenberg, J. J.; Dapprich, S.; Daniels, A. D.; Farkas, Ö.; Foresman, J. B.; Ortiz, J. V.; Cioslowski, J.; Fox, D. J. Gaussian Inc., Wallingford CT, 2009.
- (8) Hatcher, E.; Soudackov, A. V.; Hammes-Schiffer, S. *J. Am. Chem. Soc.* **2007**, *129*, 187.
- (9) Chruszcz, M.; Wlodawer, A.; Minor, W. *Biophys. J.* **2008**, *95*, 1.
